# Supplementary material for: Cranial kinesis facilitates quick retraction of stuck woodpecker beaks
Source: Oxford University Press journal article supplement (doi:10.1242/jeb.243787), 2022-02-04
Supplement: jeb243787supp.pdf [file jeb243787supp.pdf]

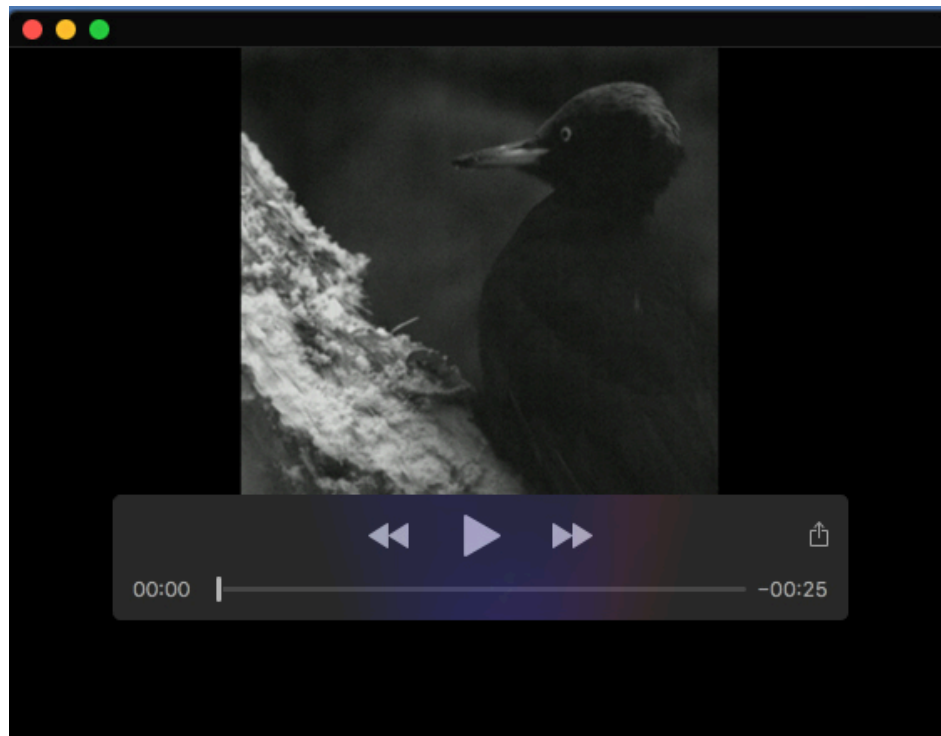

**Movie 1.** Slow-motion replays of high-speed videos showing the characteristic beak movement pattern during head retraction in *Dryocopus martius*.

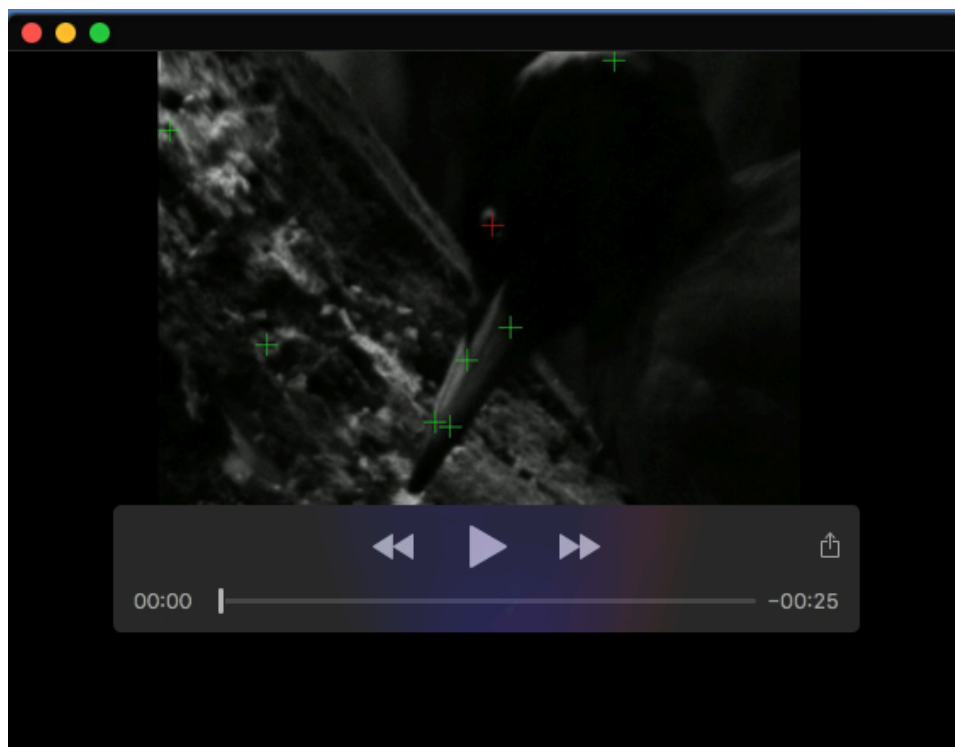

**Movie 2.** Animation of the tracked landmarks and rigid body movement inferred from these landmarks during beak retrusion in *Dryocopus martius*.

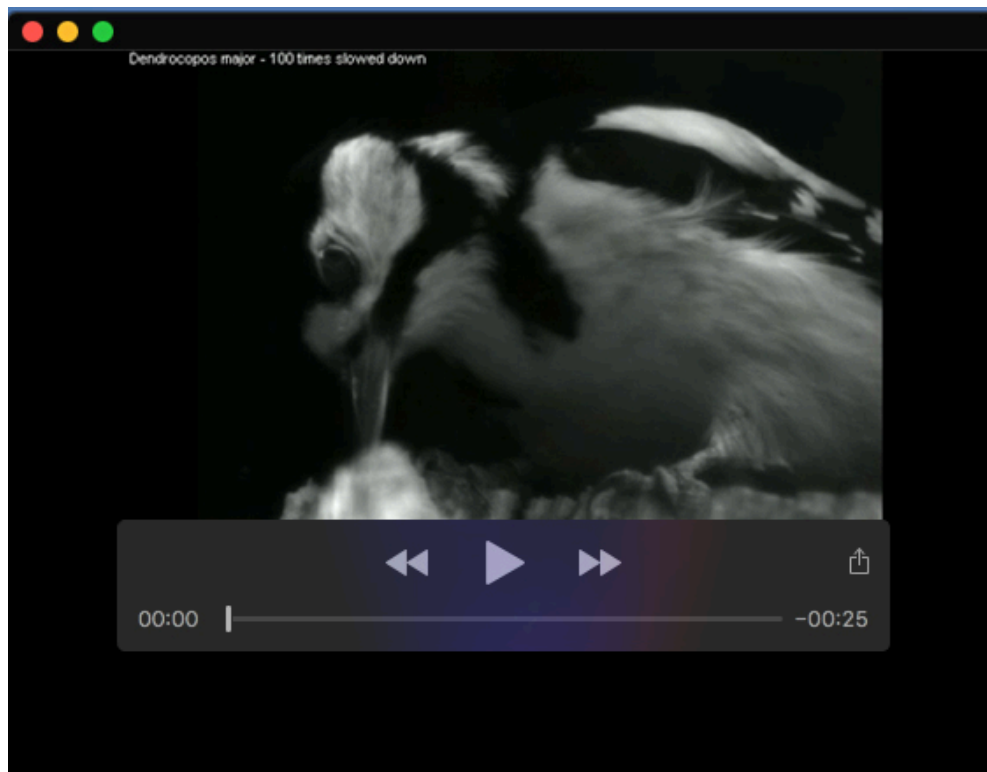

**Movie 3.** Slow-motion replay of a high-speed video showing beak movements during beak retraction in great-spotted woodpecker *Dendrocopos major* which strongly resemble those described for the black woodpecker.
